# Supplementary material
Source: publisher site journal article supplement (https://www.dovepress.com/article/576768)

## Supplementary Figure 1. Biased-Coin Up-and-Down Design Schematic for Optimal PIEB Interval Study

CI = Confidence Interval; PCEA = Patient-Controlled Epidural Analgesia; PIEB = programmed intermittent epidural bolus

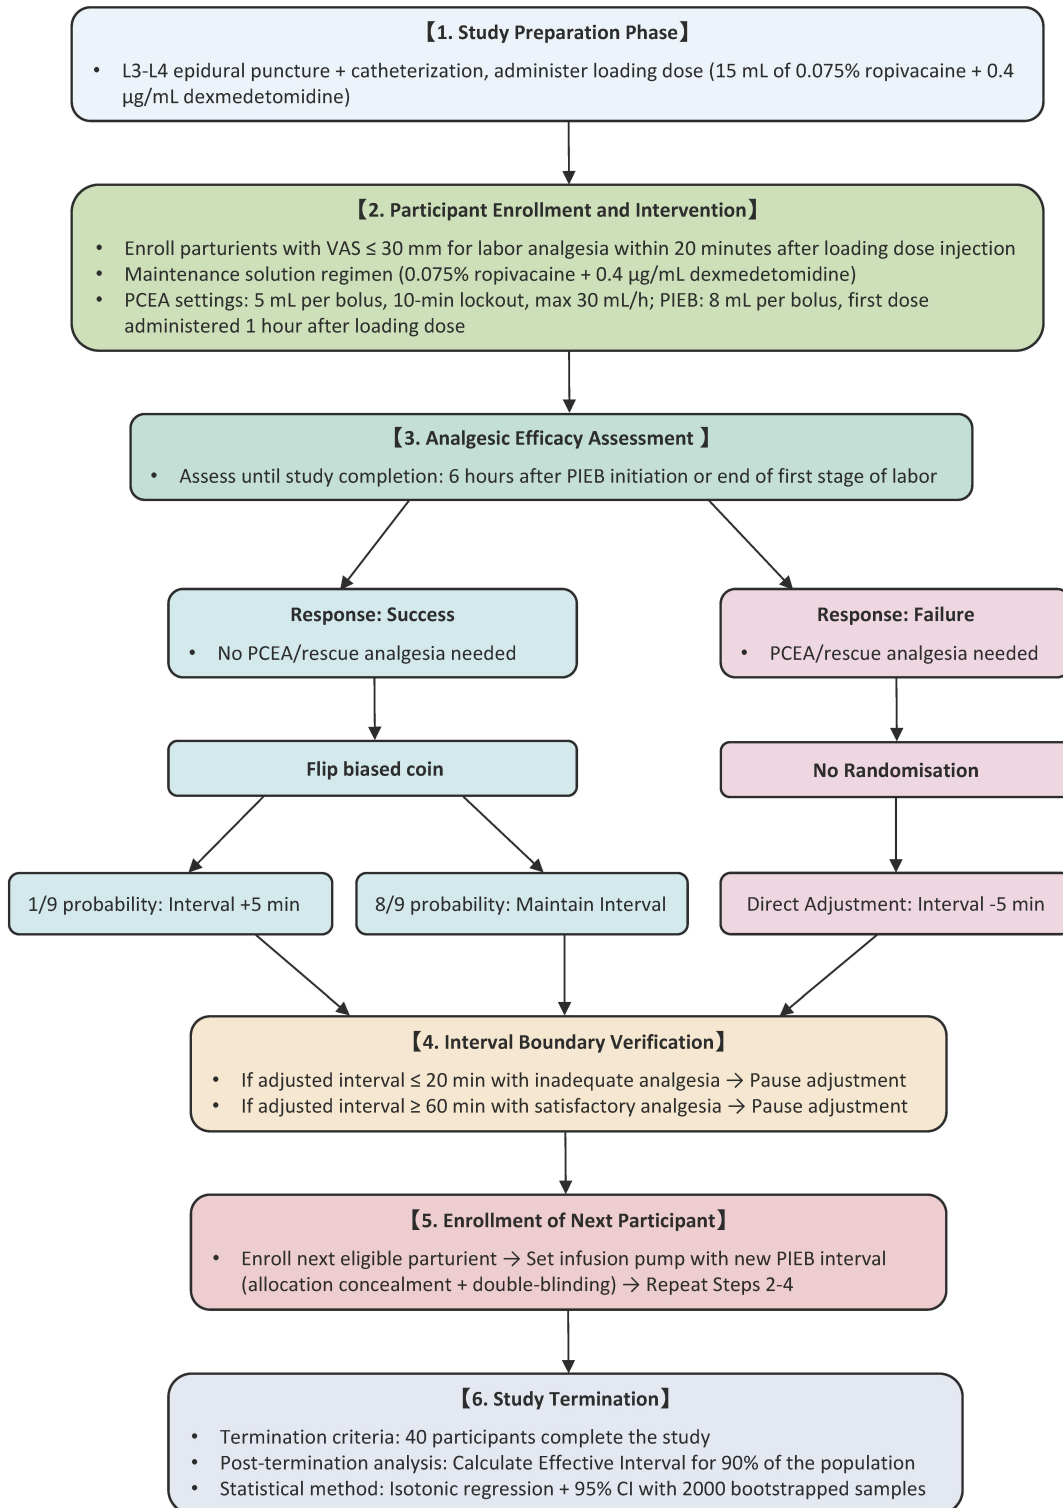

Supplement: Supplementary file 1 [file Supplemental%20Figure%201.pdf]
